# Supplementary material
Source: publisher figshare collection journal article supplement (https://gsapubs.figshare.com/ndownloader/files/22409616)

## Idaho Canyon Tuff (*Miic*) Isopach Map

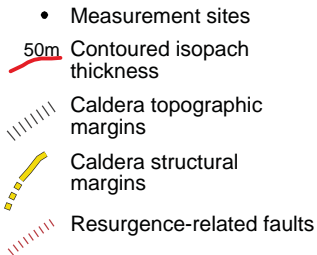

Volume: 52 km<sup>3</sup>  
(excludes intracaldera volume)

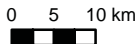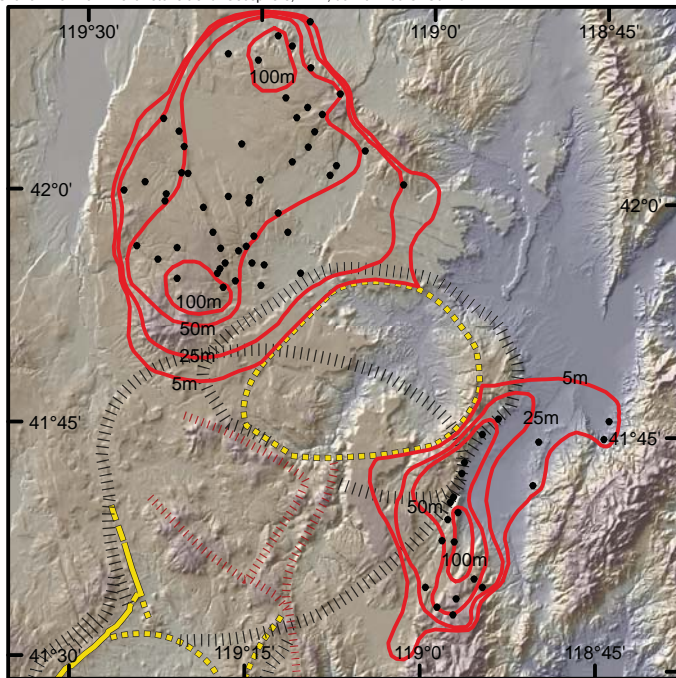

## Summit Lake Tuff (*Mis*) Isopach Map

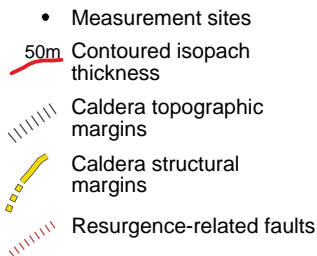

Volume: 31 km<sup>3</sup>  
(excludes intracaldera volume)

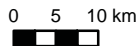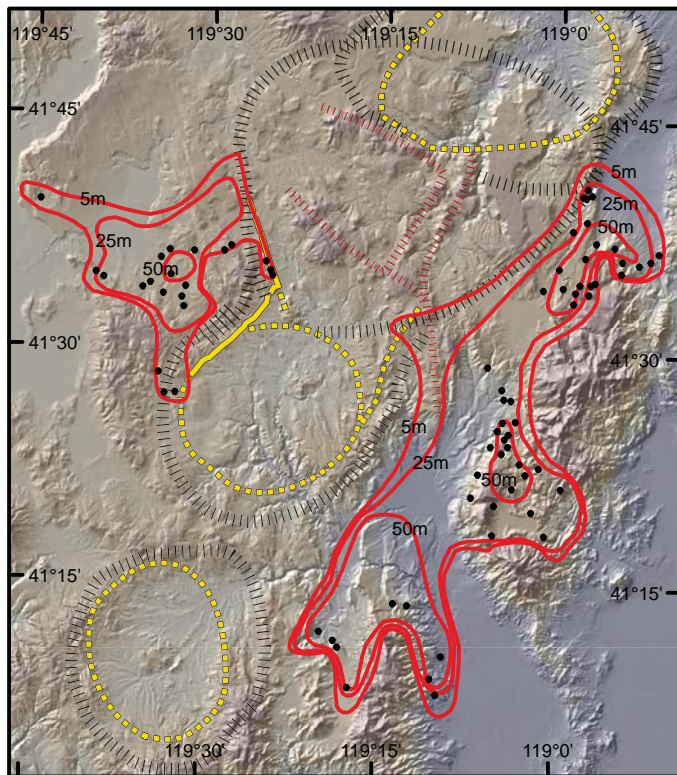

## Tuff of Big Mountain (*Mtbn*) Isopach Map

- Measurement sites
- 50m Contoured isopach thickness
- Caldera topographic margins
- Caldera structural margins
- Resurgence-related faults

Volume: 23 km<sup>3</sup>

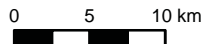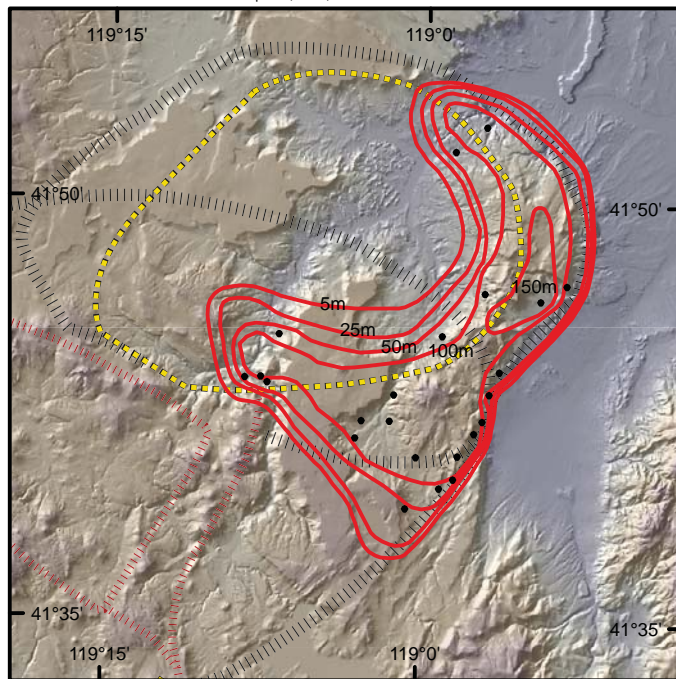

# Tuff of Coyote Spring (*Mics*) to the west, Tuff of Trough Mountain (*Mttm*) to the East Isopach Map

- Measurement sites
- 50m Contoured isopach thickness
- Caldera topographic margins
- Caldera structural margins
- Resurgence-related faults

*Mics* Volume: 5 km<sup>3</sup>  
*Mttm* Volume: 13 km<sup>3</sup>

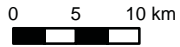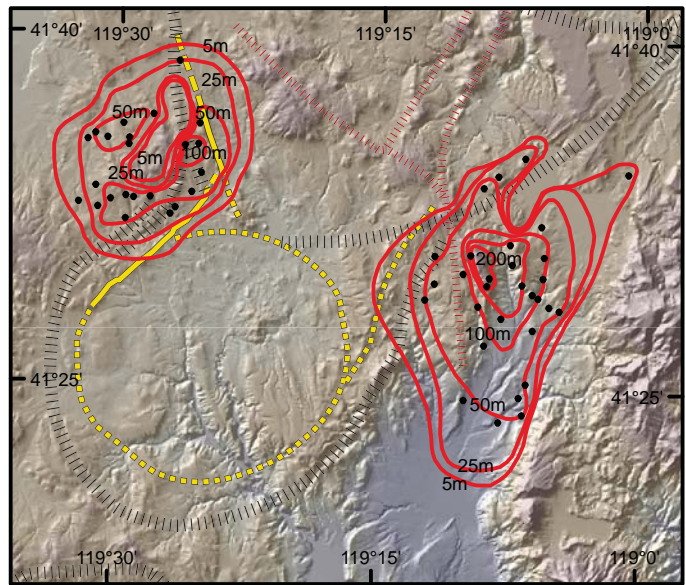



## Soldier Meadow Tuff (*Mism*) Isopach Map

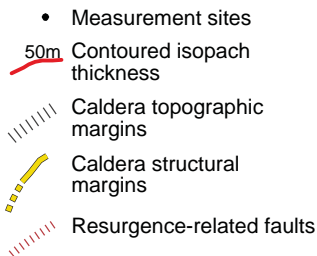

Volume: 65 km<sup>3</sup>  
(excludes intracaldera volume)

Evidence for southwest exposure  
from lithics within the younger  
Tuff of Yellow Rock Canyon.

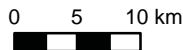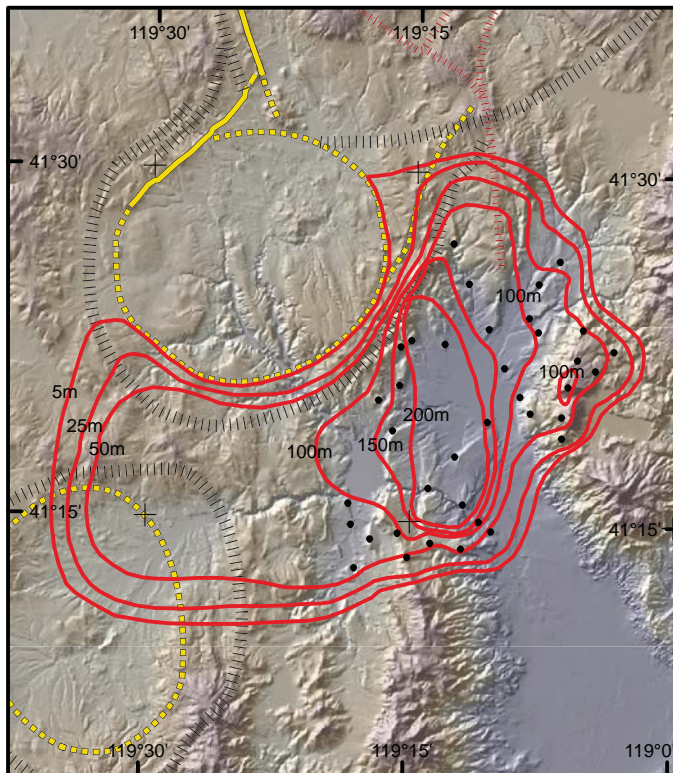

## Tuff of Alkali Flat and Tuff of Badger Mountain (*Mtab*) Isopach Map

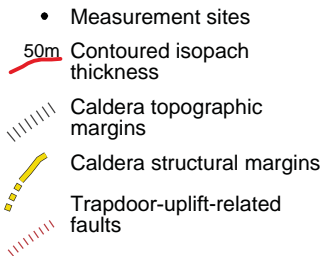

Volume: 20 km<sup>3</sup>

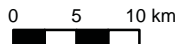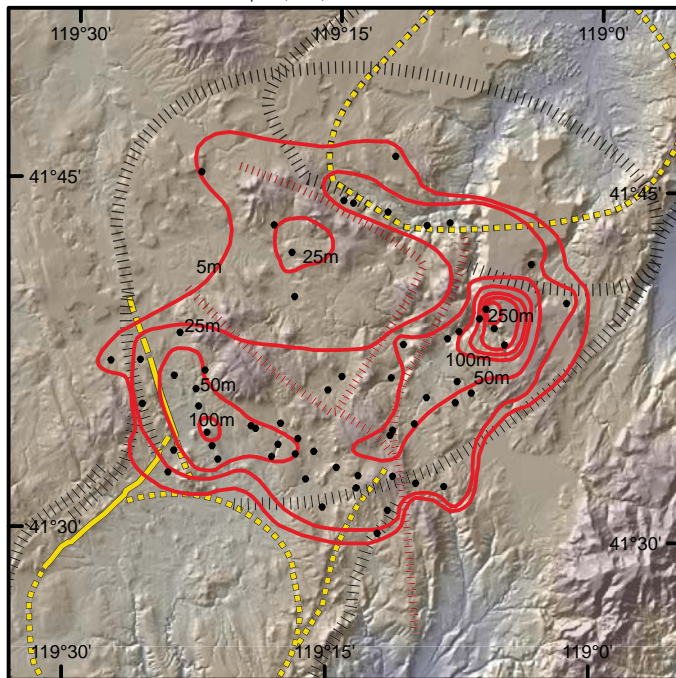

## Tuff of Yellow Rock Canyon (*Miy*) Isopach Map

- Measurement sites
- 50m Contoured isopach thickness
- Caldera topographic margins
- Caldera structural margins
- Resurgence-related faults

Volume: 50 km<sup>3</sup>  
(excludes intracaldera volume)

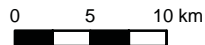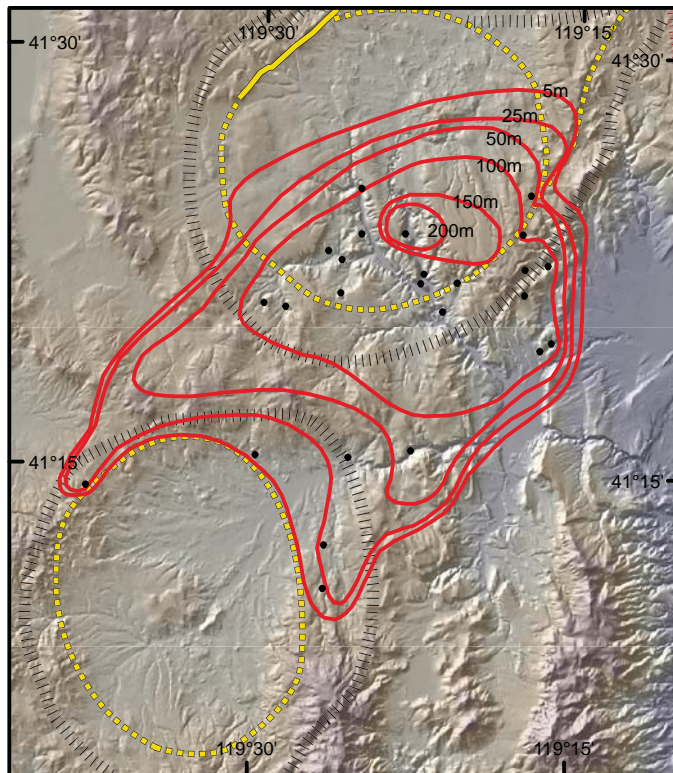

Supplement: Supplementary file 1 [file 22409616]
